# Supplementary material for: Validity and repeatability of the EPIC physical activity questionnaire: a validation study using accelerometers as an objective measure
Source: Springer Nature journal article supplement (doi:10.1186/1479-5868-5-33), 2008-01-01
Supplement: Additional file 3 [file 1479-5868-5-33-s3.doc]

**Additional file 3:** The classification of physical activity according to the Cambridge Physical Activity Index

| **Work activity** | **Leisure time physical activity**  **(Duration of sport and cycling in hours/week)** | | | |
| --- | --- | --- | --- | --- |
| None | ≤ 3.5 | >3.5 and ≤ 7.0 | > 7.0 |
| Sedentary or non-worker | Inactive | Moderately inactive | Moderately active | Active |
| Standing | Moderately inactive | Moderately active | Active | Active |
| Manual | Moderately active | Active | Active | Active |
| Heavy manual | Active | Active | Active | Active |
